# Supplementary material for: Omega-3 Fatty Acid and Iron Supplementation Alone, but Not in Combination, Lower Inflammation and Anemia of Infection in Mycobacterium tuberculosis-Infected Mice
Source: MDPI journal article supplement (doi:10.3390/nu12092897), 2020-09-22
Supplement: s1 [file s1]

## Supplement

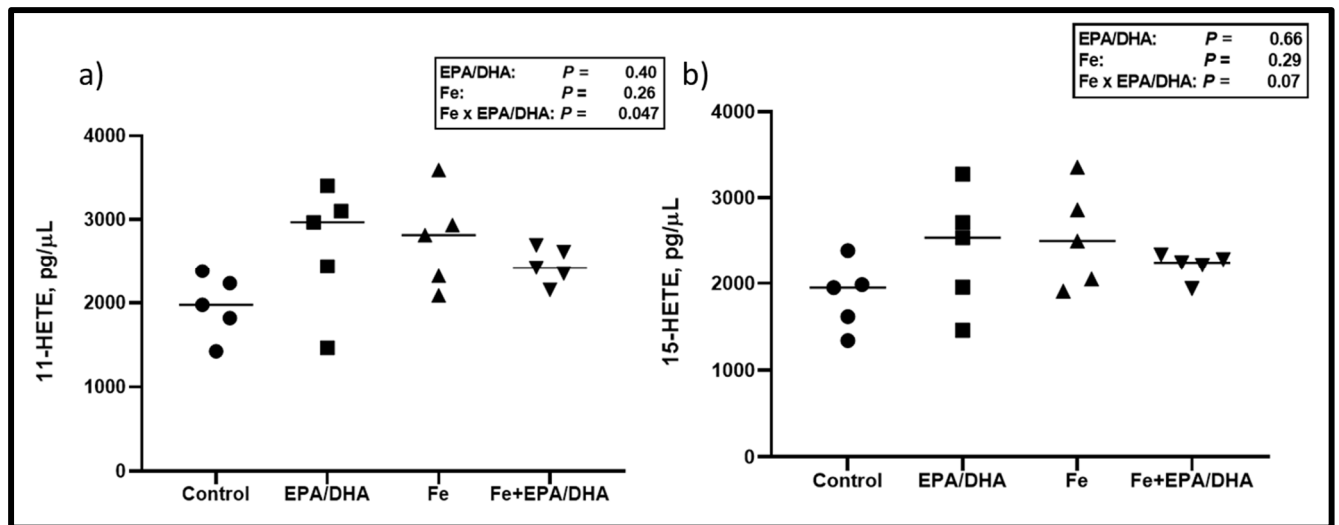

**Figure S1.** Lipid mediator concentrations including a) 11-HETE and b) 15-HETE after providing *Mtb*-infected mice with control, EPA/DHA, Fe, or Fe+EPA/DHA diets for 3 weeks. The values represent mean  $\pm$  SEM. Results repeated in two experiments, data shown for one experiment (n=5 per group). Two-way ANOVA was used to test effects of EPA/DHA (control & Fe vs. EPA/DHA & Fe+EPA/DHA), Fe (control & EPA/DHA vs. Fe & Fe+EPA/DHA), and Fe x EPA/DHA interactions. One-way ANOVA followed by Tukey post-hoc test was used to compare groups. EPA/DHA, eicosapentaenoic and docosahexaenoic acid supplemented group; Fe, iron supplemented group; Fe+EPA/DHA, iron plus eicosapentaenoic and docosahexaenoic acid supplemented group; HETE, hydroxyeicosatetraenoic acid.

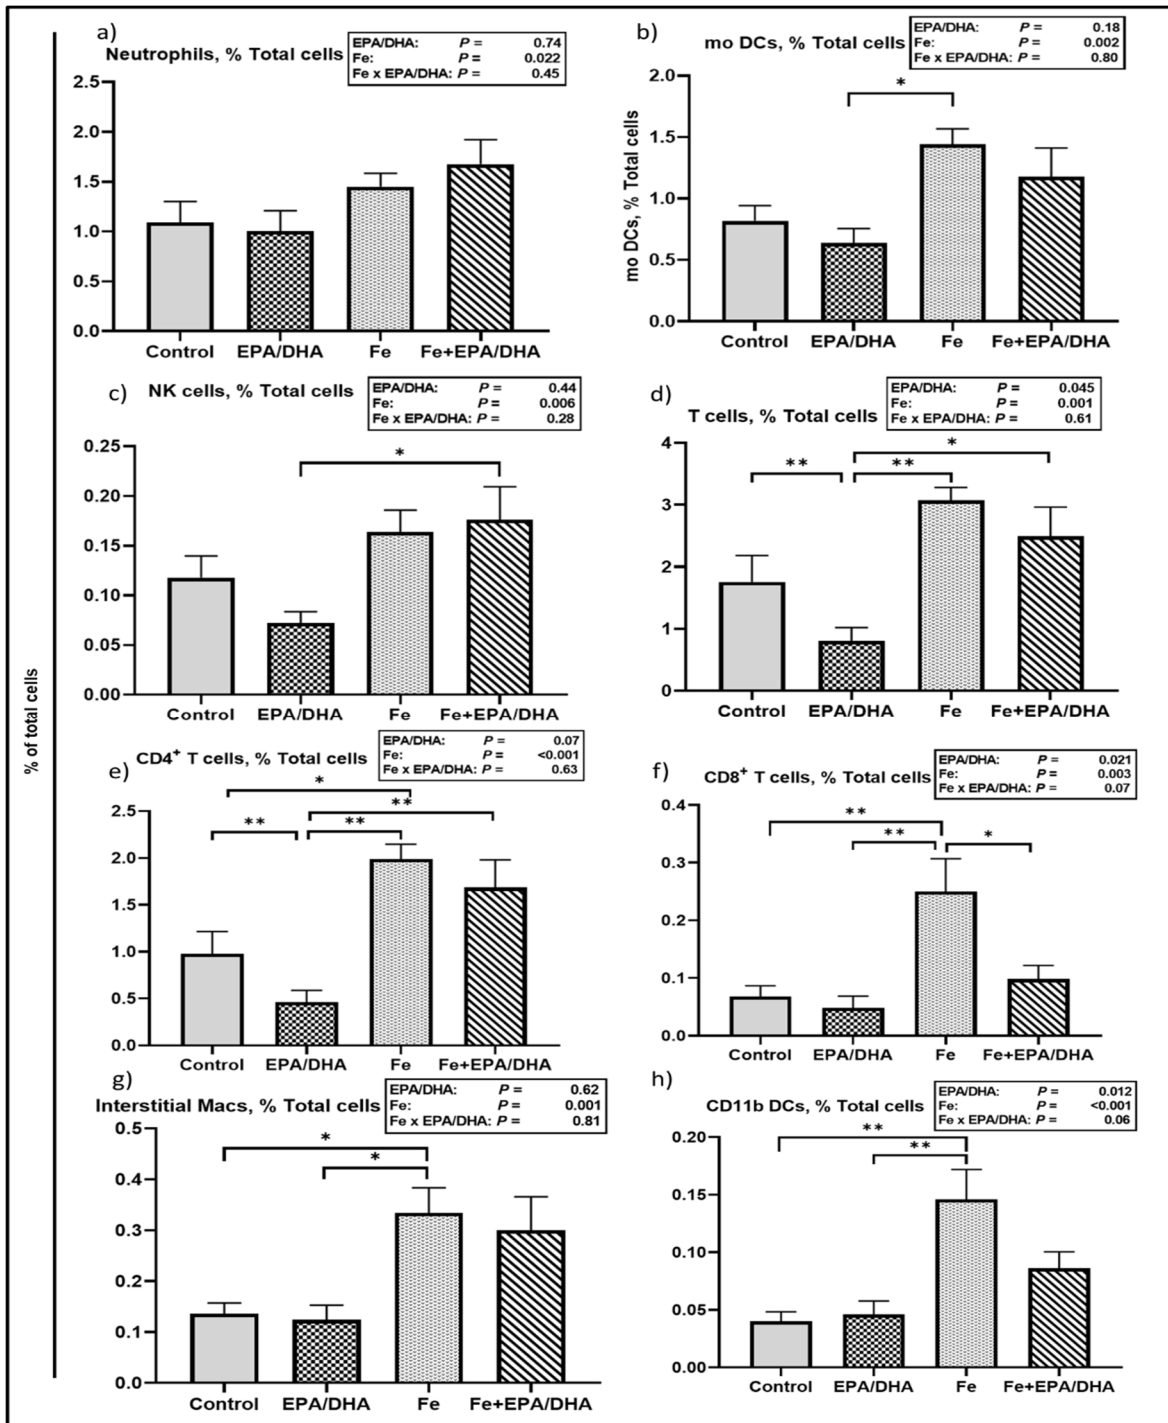

**Figure S2.** Lung immune cells as percentages of total cells after providing *Mtb*-infected mice with control, EPA/DHA, Fe, or Fe+EPA/DHA diets for 3 weeks, including a) neutrophils, b) Mo dendritic cells, c) natural killer cells, d) T cells, e) CD4<sup>+</sup> T cells, f) CD8<sup>+</sup> T cells, g) interstitial macrophages, and h) CD11b dendritic cells. The values represent mean  $\pm$  SEM. Results repeated in two experiments, data shown for one experiment (n=5 per group). Two-way ANOVA was used to test effects of EPA/DHA (control & Fe vs. EPA/DHA & Fe+EPA/DHA), Fe (control & EPA/DHA vs. Fe & Fe+EPA/DHA), and Fe x EPA/DHA interactions. One-way ANOVA followed by Tukey post hoc test was used to compare means. \* $P < 0.05$ , \*\* $P < 0.01$ . DCs: dendritic cells; EPA/DHA: eicosapentaenoic and docosahexaenoic acid supplemented group; Fe: iron supplemented group; Fe+EPA/DHA: iron plus eicosapentaenoic and docosahexaenoic acid supplemented group; macs: macrophages; mo DCs: monocyte-derived DCs; NK: natural killer.
